# Supplementary material for: Effective 3D open-channel nanostructures of a MgMn2O4 positive electrode for rechargeable Mg batteries operated at room temperature
Source: Royal Society of Chemistry journal article supplement (doi:10.1039/d0ta07974j), 2021-01-01
Supplement: d0ta07974j1.pdf [file d0ta07974j1.pdf]

## Supplementary Information

### Effective 3D open-channel nanostructures of a $\text{MgMn}_2\text{O}_4$ positive electrode for rechargeable Mg batteries operated at room temperature

Kazuki Sone,<sup>a</sup> Yoshihiro Hayashi,<sup>a</sup> Toshihiko Mandai,<sup>b</sup> Shunsuke Yagi,<sup>b</sup> Yuya Oaki,<sup>a</sup> and Hiroaki Imai<sup>\*a</sup>

<sup>a</sup>Department of Applied Chemistry, Faculty of Science and Technology, Keio University, 3-14-1 Hiyoshi, Kohoku-ku, Yokohama 223-8522, Japan

<sup>b</sup>Center for Research on Energy and Environmental Materials, National Institute for Materials Science (NIMS), 1-1 Namiki, Tsukuba, 305-0044 Ibaraki, Japan.

<sup>c</sup>Institute of Industrial Science, The University of Tokyo, 4-6-1 Komaba, Meguro-ku, Tokyo 153-8505, Japan.

Fig. S1 Illustrations of the MMO powder preparation using a modified sol-gel method through propylene-oxide-driven complex polymerization, in which supersonic was irradiated to accelerate the gelation and the gel-aging time was controlled.

Fig. S2 The Mg coin-cell structure and the components inside: (a) the cross-sectional illustration of the coin cell, and the structural specifications for (b) the full cell with the MMO positive electrode and the Mg negative one in the  $\text{Mg}[\text{B}(\text{HFIP})_4]_2/\text{G3}$  electrolyte, and the half cells with the MMO positive electrode and the carbon negative one in (c) the  $\text{Mg}[\text{B}(\text{HFIP})_4]_2/\text{G3}$  electrolyte and (d) the  $\text{Mg}(\text{ClO}_4)_2/\text{AN}$  electrolyte.

Fig. S3 Cyclic voltammograms for the  $\text{Mg}(\text{ClO}_4)_2/\text{AN}$  electrolyte using the  $\text{MgMn}_2\text{O}_4$  positive electrode with and without the  $\text{V}_2\text{O}_5$  coating.

Fig. S4 Current-voltage characteristics for the  $\text{Mg}[\text{B}(\text{HFIP})_4]_2/\text{G3}$  electrolyte (a) and the cyclic voltammogram of the  $\text{Mg}/(\text{borate}/\text{G3})/\text{MMO}$  system (b).

Fig. S5 Pore-size distributions, cumulative pore volumes, and  $S_{\text{BET}}$  measured by the nitrogen adsorption isotherm for the MMO powders obtained by 5 h-calcination at 300 °C from the dried gels aged for (1) 1 h, (b) 24 h, (c) 72 h, and (d) 168 h.

Fig. S6 TG/DTA profiles of the dried gel.

Fig. S7 Pore-size distributions, cumulative pore volumes, and  $S_{\text{BET}}$  measured by the nitrogen adsorption isotherm for the MMO powders obtained by the 5 h calcination at (a) 300 °C (b) 400 °C (c) 500 °C, and (d) 600 °C. All of the gels were aged for 24 h.

Fig. S8 Arrhenius plot of  $S_{\text{BET}}$  and  $D_{\text{BET}}$  for the MMO powders obtained by the 5 h calcination at 300–600 °C from the dried gels aged for 24 h.

Fig. S9 Open circuit voltage (OCV) and the average discharged potentials at 25 °C in the 1st cycle for the full cell of Mg/(borate/G3)/MMO as a function of  $S_{\text{BET}}$  of the MMO powders.

Fig. S10 Discharge capacity at 25 °C in the 1<sup>st</sup> cycle for the full cell of Mg/(borate/G3)/MMO as a function of  $D_{\text{BET}}$  of the MMO powders.

Fig. S11 Discharge capacities as a function of the maximum charging voltage in the full cell of the Mg/(borate/G3)/MMO, in which was used the MMO powder calcinated at 300 °C from the 1 h-aged gel.

Fig. S12 Photographs of (a) the Mg-alloy negative electrode and (b) the separator in the full cell of Mg/(borate/G3)/MMO before and after the 10 cycle operation.

Fig. S13 Changes in the XRD patterns of the MMO powders (a) in the half cell, Mg/(perchlorate/AN)/MMO, cycled with  $\Delta E = 2.0\text{V}$  (-1.0–+1.0V vs. CE, or eq. +1.6–+3.6 V vs. Mg/Mg<sup>2+</sup>) and (b) in the full cell, Mg/(borate/G3)/MMO, cycled in  $\Delta E = 3.8\text{V}$  (+0.2–+4.0 V vs. Mg/Mg<sup>2+</sup>).

Fig. S14 Cyclic voltammograms for the Mg/([B(HFIP)<sub>4</sub>]<sub>2</sub>/G3)/MMO having low (108 m<sup>2</sup>/g) (a) and high (246 m<sup>2</sup>/g) (b) specific surface areas

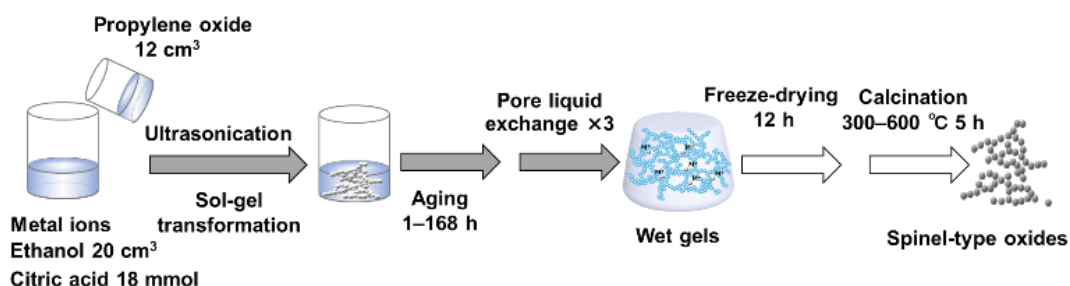

Fig. S1 Illustrations of the MMO powder preparation using a modified sol-gel method through propylene-oxide-driven complex polymerization, in which supersonic was irradiated to accelerate the gelation and the gel-aging time was controlled.

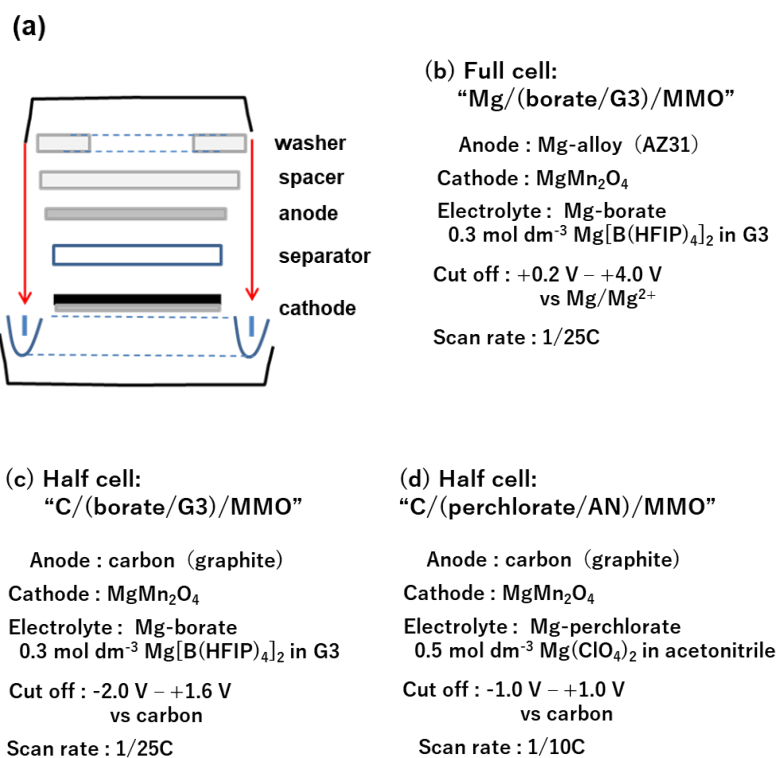

Fig. S2 The Mg coin-cell structure and the components inside: (a) the cross-sectional illustration of the coin cell, and the structural specifications for (b) the full cell with the MMO positive electrode and the Mg-alloy negative one in the  $\text{Mg}[\text{B}(\text{HFIP})_4]_2/\text{G3}$  electrolyte, and the half cells with the MMO positive electrode and the carbon negative one in (c) the  $\text{Mg}[\text{B}(\text{HFIP})_4]_2/\text{G3}$  electrolyte and (d) the  $\text{Mg}(\text{ClO}_4)_2/\text{AN}$  electrolyte.

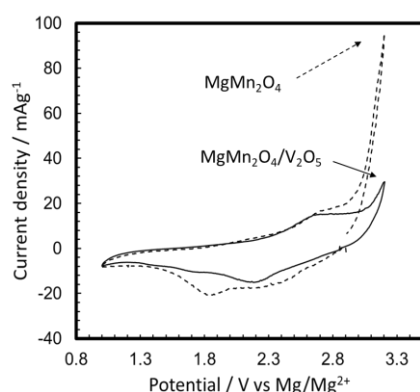

Fig. S3 Cyclic voltammograms for the  $\text{Mg}(\text{ClO}_4)_2/\text{AN}$  electrolyte using the  $\text{MgMn}_2\text{O}_4$  positive electrode with and without the  $\text{V}_2\text{O}_5$  coating. Carbon was used as a counter electrode. A Ag wire immersed in AN containing  $0.01 \text{ mol/dm}^3 \text{ AgNO}_3$  and  $0.10 \text{ mol/dm}^3$  tetrabutylammonium perchlorate was used as the reference electrode. The measured potentials were converted to their values vs.  $\text{Mg/Mg}^{2+}$  using the following relationship:  $0 \text{ V vs. Mg/Mg}^{2+} = -2.6 \text{ V vs. Ag/Ag}^+$ .

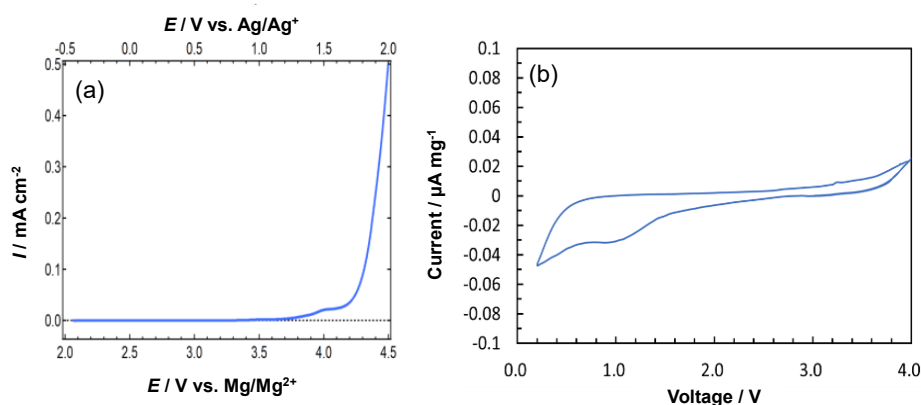

Fig. S4 Current-voltage characteristics for the  $\text{Mg}[\text{B}(\text{HFIP})_4]_2/\text{G3}$  electrolyte (a) and the cyclic voltammogram of the  $\text{Mg}/(\text{borate}/\text{G3})/\text{MMO}$  system (b). The specific surface area of the MMO powder was  $42 \text{ m}^2/\text{g}$ .

We measured cyclic voltammograms (Fig. S3) for the  $\text{Mg}(\text{ClO}_4)_2/\text{AN}$  electrolyte using the MMO positive electrode with and without the  $\text{V}_2\text{O}_5$  coating. As shown in the voltammograms, anodic electrolyte decomposition occurred above about  $2.8 \text{ V vs Mg/Mg}^{2+}$ . Although the  $\text{V}_2\text{O}_5$  coating on the MMO positive electrode was reported to suppress the decomposition of the electrolyte (Ref. 23 in the main manuscript), we observed the anodic decomposition above about  $3.0 \text{ V vs Mg/Mg}^{2+}$ . The anodic current hinders the oxidation of the positive electrode and results in the lower performance of the MMO powders. On the other hand, the anodic decomposition of the  $\text{Mg}[\text{B}(\text{HFIP})_4]_2/\text{G3}$  electrolyte occurs above  $4.0 \text{ V vs Mg/Mg}^{2+}$  as shown in Fig. S4. Thus, the cutoff voltage was limited between  $-1.0 \text{ V}$  and  $+1.0 \text{ V vs. carbon}$  for the  $\text{Mg}(\text{ClO}_4)_2/\text{AN}$  electrolyte and was set between  $-2.0 \text{ V}$  and  $+1.6 \text{ V vs. carbon}$  for the  $\text{Mg}[\text{B}(\text{HFIP})_4]_2/\text{G3}$  electrolyte.

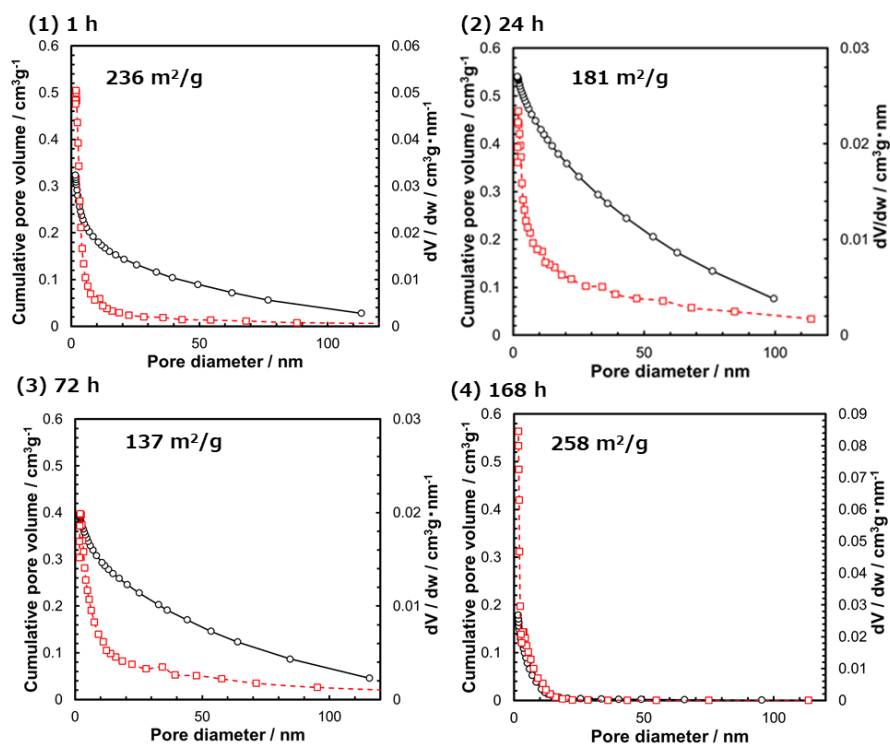

Fig. S5 Pore-size distributions, cumulative pore volumes, and  $S_{\text{BET}}$  measured by the nitrogen adsorption isotherm for the MMO powders obtained by 5 h calcination at 300 °C from the dried gels aged for (1) 1 h, (b) 24 h, (c) 72 h, and (d) 168 h.

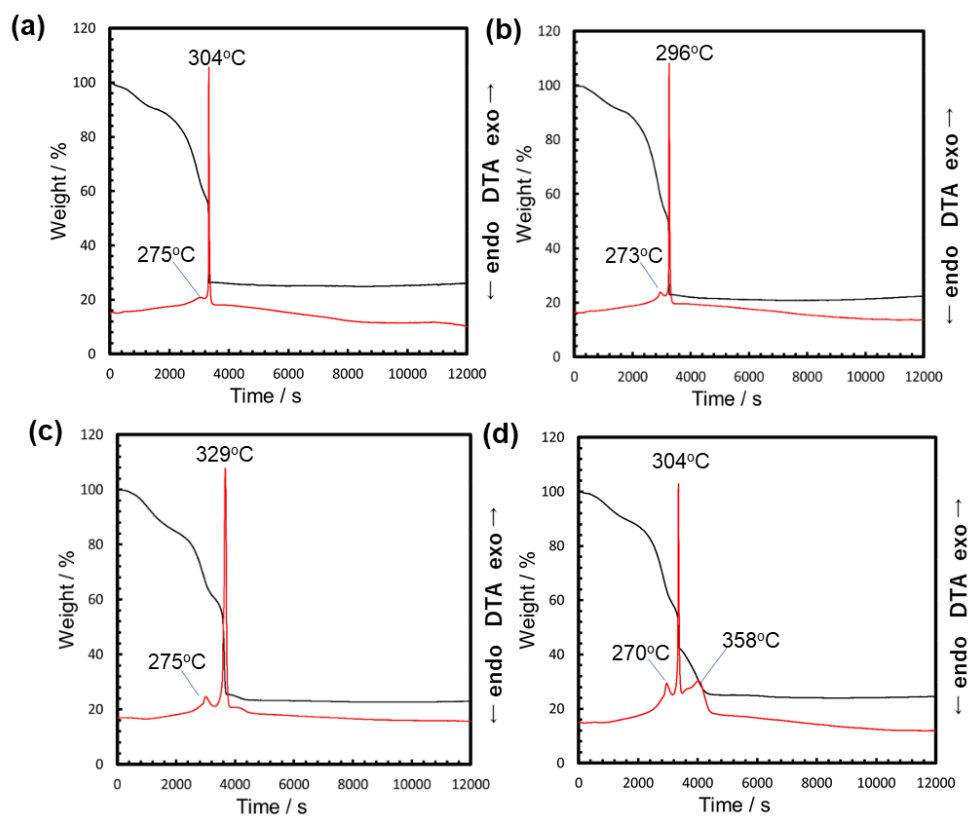

Fig. S6 TG/DTA profiles of the dried gel aged for (a) 1h, (b) 24 h, (c) 72 h, and (d) 168 h. The temperature rising rate was 5 °C/min.

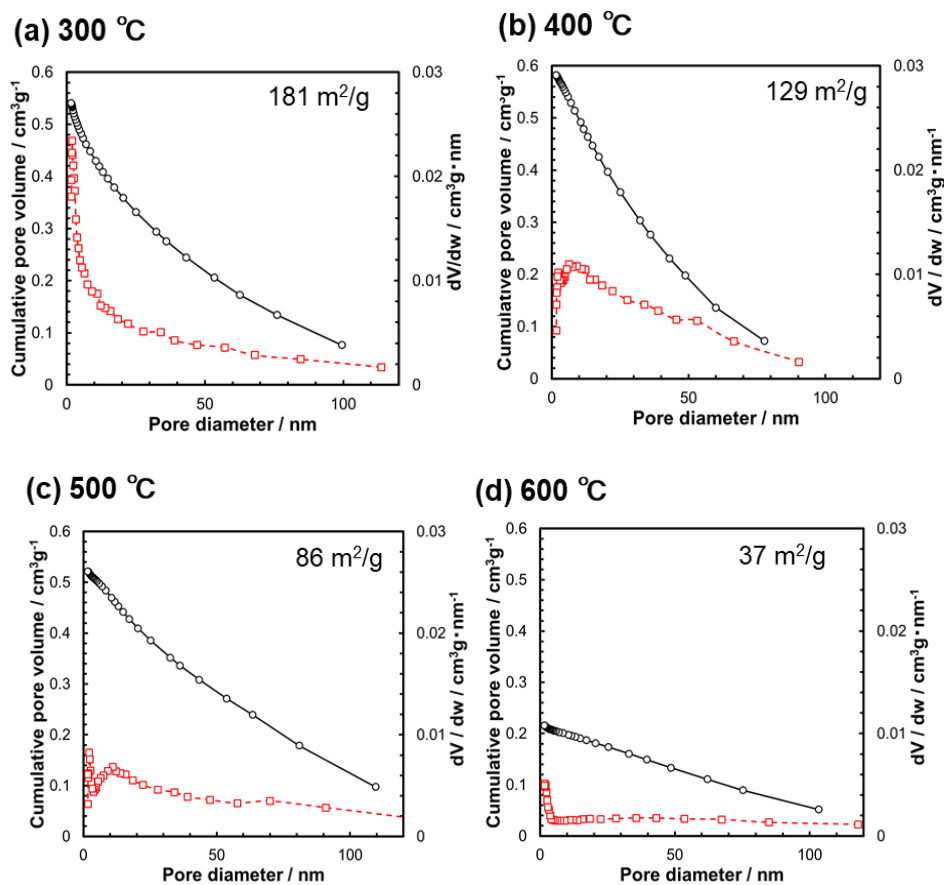

Fig. S7 Pore-size distributions, cumulative pore volumes, and  $S_{\text{BET}}$  measured by the nitrogen adsorption isotherm for the MMO powders obtained by the 5 h calcination at (a) 300 °C (b) 400 °C (c) 500 °C, and (d) 600 °C. All of the gels were aged for 24 h.

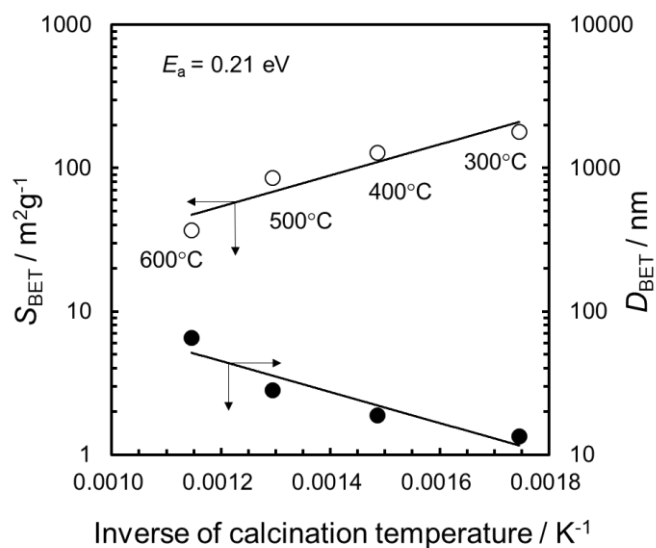

Fig. S8 Arrhenius plot of  $S_{\text{BET}}$  and  $D_{\text{BET}}$  for the MMO powders obtained by the 5 h-calcination at 300–600°C from the dried gels aged for 24 h.

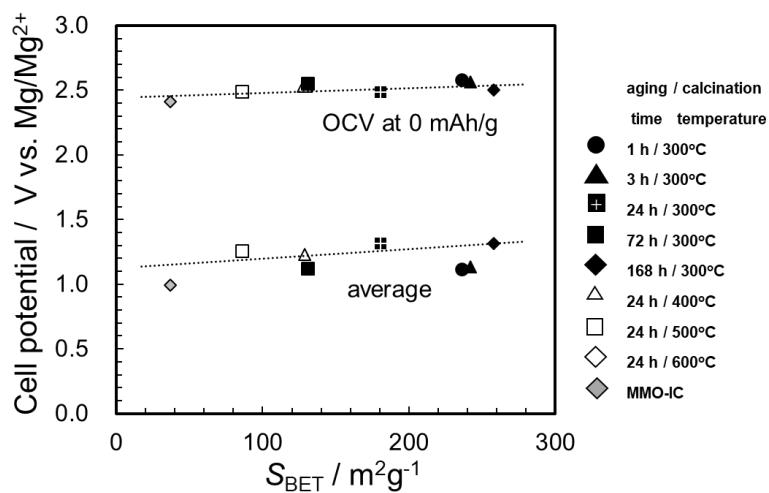

Fig. S9 Open circuit voltage (OCV) and the average discharged potentials at 25 °C in the 1st cycle for the full cell of Mg/(borate/G3)/MMO as a function of  $S_{\text{BET}}$  of the MMO powders in the positive electrodes.



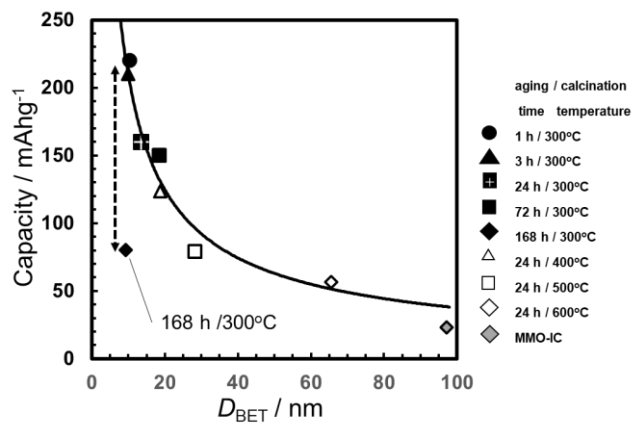

Fig. S10 Discharge capacity at 25 °C in the 1<sup>st</sup> cycle for the full cell of Mg/(borate/G3)/MMO as a function of  $D_{\text{BET}}$  of the MMO powders

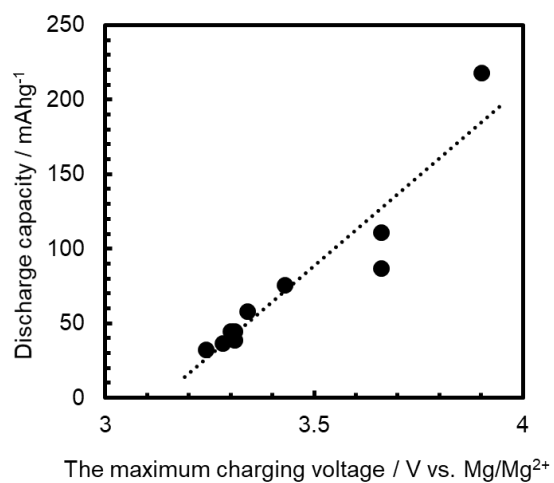

Fig. S11 Discharge capacities as a function of the maximum charging voltage in the full cell of the Mg/(borete/G3)/MMO, in which was used the MMO powder calcinated at 300 °C from the 1 h aged gel.

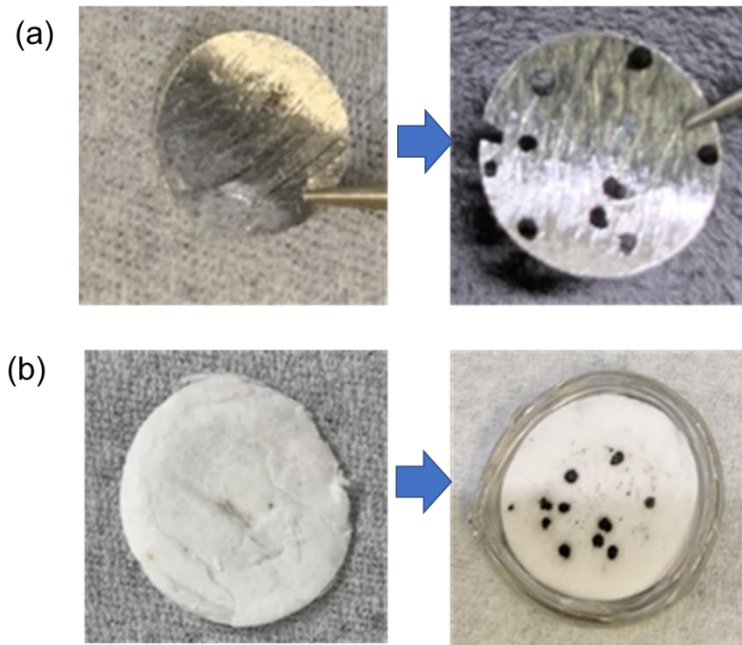

Fig. S12 Photographs of (a) the Mg-alloy negative electrode and (b) the separator in the full cell of Mg/(borate/G3)/MMO before and after the 10 cycle operation.

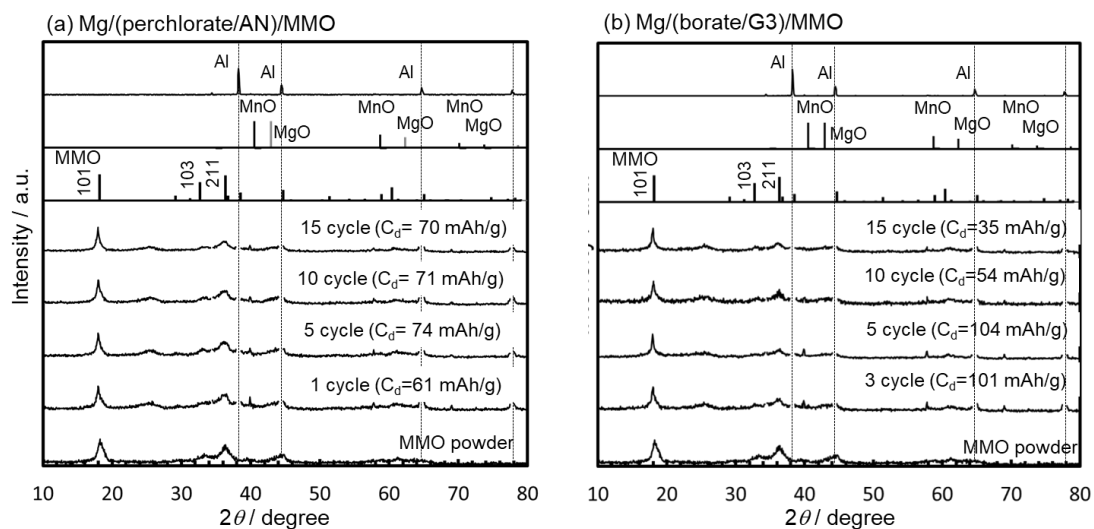

Fig. S13 Changes in the XRD patterns of the MMO powders (a) in the half cell, Mg/(perchlorate/AN)/MMO, cycled on  $\Delta E = 2.0$  V (-1.0–+1.0 V vs. CE, or eq. +1.6–+3.6 V vs. Mg/Mg<sup>2+</sup>) and (b) in the full cell, Mg/(borate/G3)/MMO, cycled in  $\Delta E = 3.8$  V (+0.2–+4.0 V vs. Mg/Mg<sup>2+</sup>).

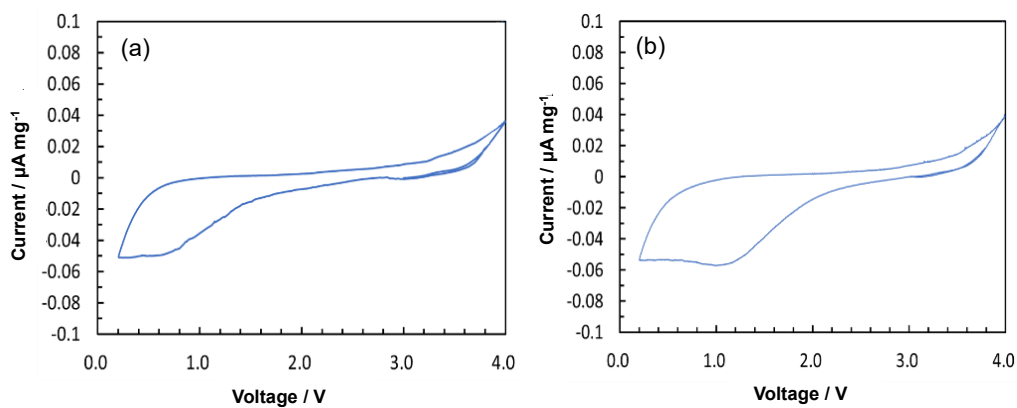

Fig. S14 Cyclic voltammograms for the Mg/([B(HFIP)<sub>4</sub>]<sub>2</sub>/G3)/MMO having low (108 m<sup>2</sup>/g) (a) and high (246 m<sup>2</sup>/g) (b) specific surface areas
